# Supplementary material
Source: publisher figshare collection journal article supplement (https://acs.figshare.com/ndownloader/files/3586491)
Supplement: Supplementary file 1 [file 3586491]

# Mixed Quantum-Classical Description of Excitation Energy Transfer in a Model Fenna-Matthews-Olsen Complex

Aaron Kelly and Young Min Rhee

*Department of Chemistry, Pohang University of Science and Technology (POSTECH),*

*Pohang 790-784, Korea*

## Supporting Information

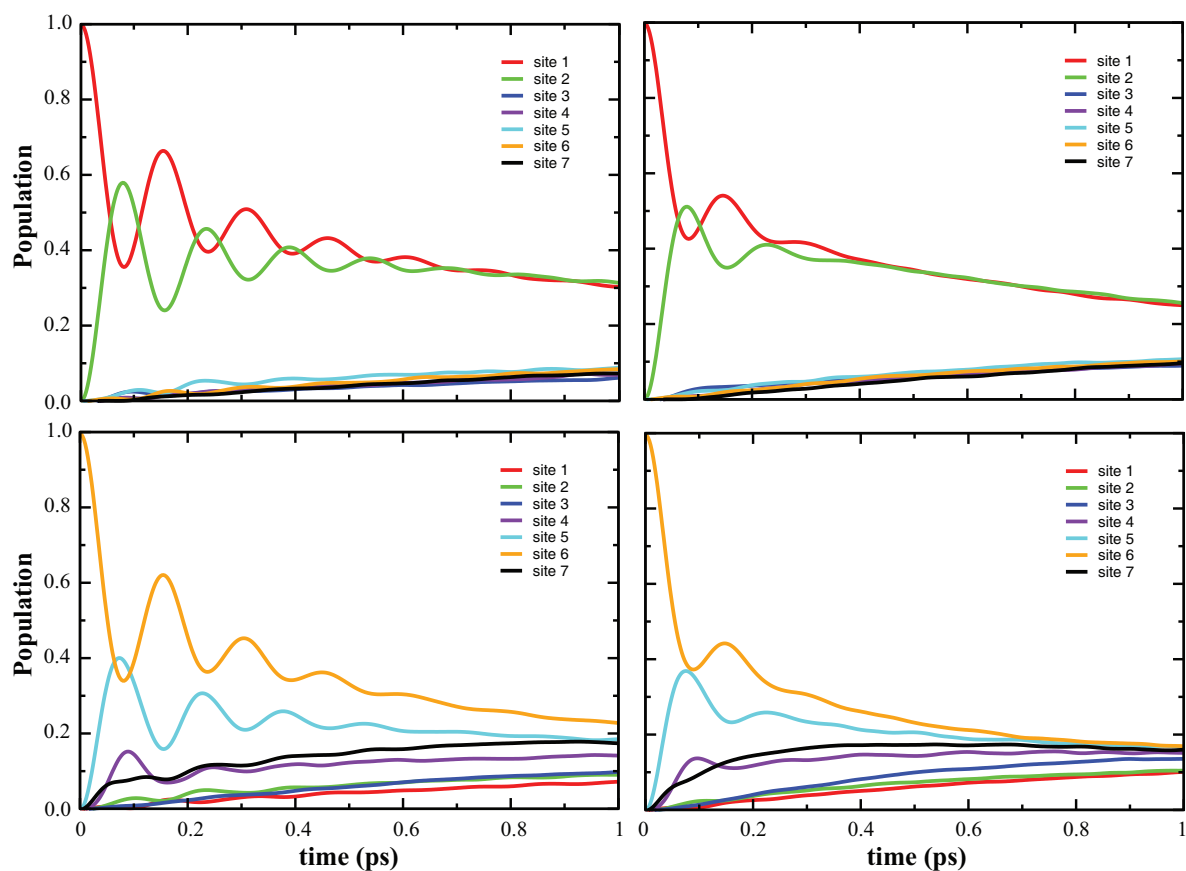

Figure S1. Time evolution of various site populations for the FMO model with Debye bath at  $T = 77$  K (left panels) and  $300$  K (right panels). The initial states correspond to the exciton localized at site 1 (top panels) and site 6 (bottom panels). From this figure, one can clearly see that all populations remain in the nonnegative region at both  $77$  K and  $300$  K.
